# Supplementary material for: Combined TCR Repertoire Profiles and Blood Cell Phenotypes Predict Melanoma Patient Response to Personalized Neoantigen Therapy plus Anti-PD-1
Source: PubMed Central journal article supplement — Cell Rep Med. 2020 Nov 17;1(8):100141. doi: 10.1016/j.xcrm.2020.100141 (PMC7691446; doi:10.1016/j.xcrm.2020.100141), 2020-11-17
Supplement: mmc1.pdf [file mmc1.pdf]

**Cell Reports Medicine, Volume 1**

**Supplemental Information**

**Combined TCR Repertoire Profiles and Blood Cell  
Phenotypes Predict Melanoma Patient Response  
to Personalized Neoantigen Therapy plus Anti-PD-1**

**Asaf Poran, Julian Scherer, Meghan E. Bushway, Rana Besada, Kristen N. Balogh, Amy Wanamaker, Reid G. Williams, Jasmina Prabhakara, Patrick A. Ott, Siwen Hu-Lieskovan, Zakaria S. Khondker, Richard B. Gaynor, Michael S. Rooney, and Lakshmi Srinivasan**

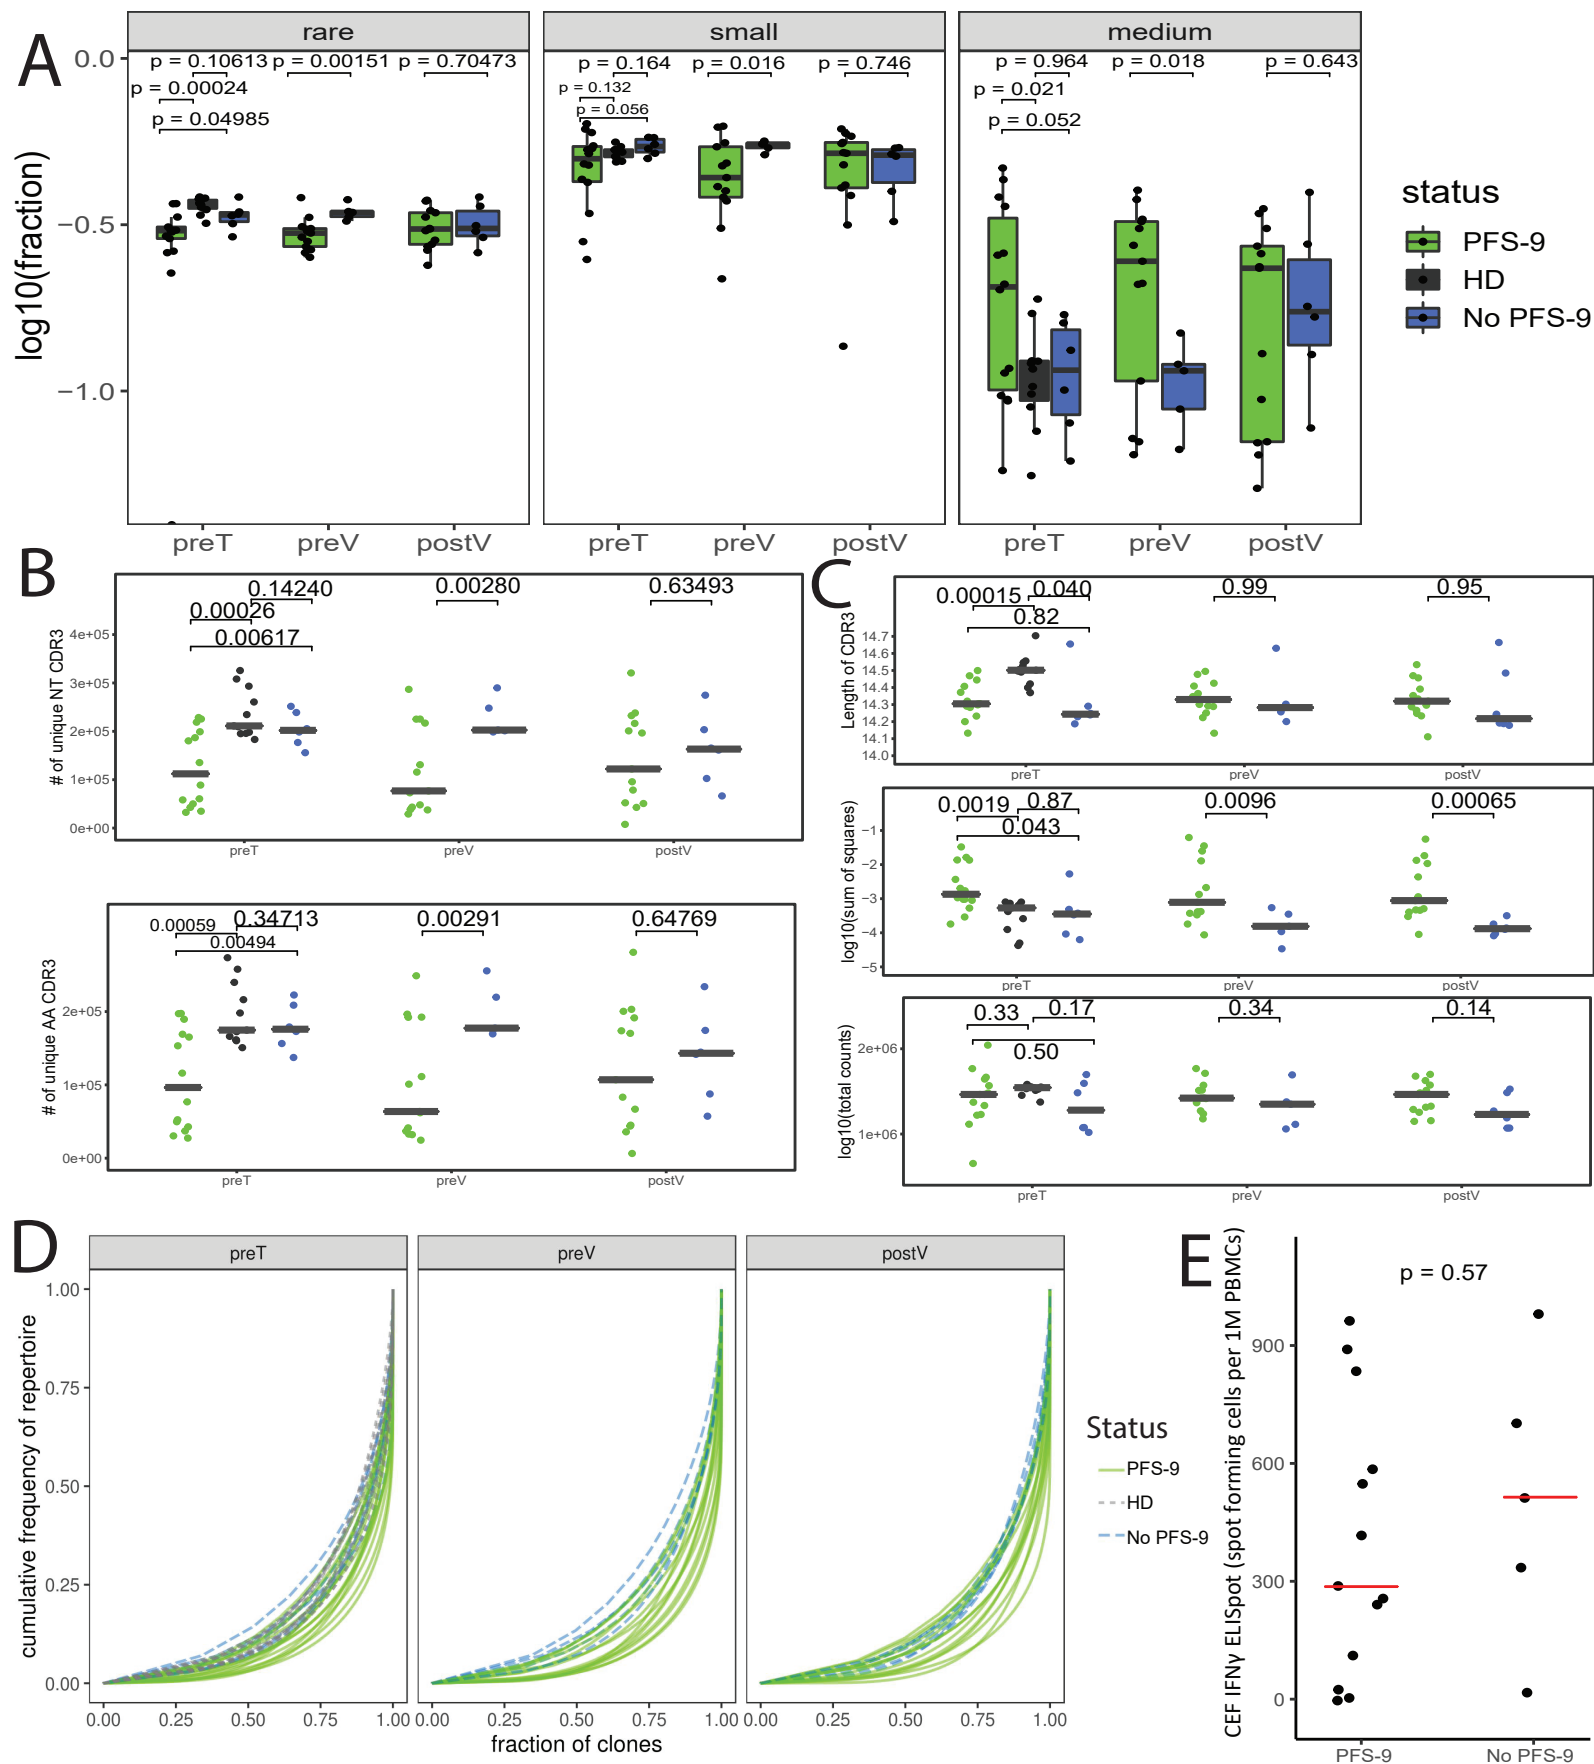

**Fig. S1 – Comparison of additional TCR repertoire features and clonality measurements between patients with and without PFS-9 (Related to Figure 1).**

**A)** The (log-)fraction of clones belonging to the “rare” (left), “small” (center), or “medium” (right), of patients with or without PFS-9 at each time-point, in addition to 11 healthy donors. Boxplots indicate 25%, 50% and 75% percentiles and whiskers extend to the smallest/largest value within 1.5 times the interquartile range. Related to Fig. 1C. **B)** The number of unique amino acid (AA, bottom) and nucleotide (NT, top) sequences of each patient or HD across time-points. Black line indicates median. Related to Fig. 1D. **C)** Average length of the CDR3 (top),  $\log_{10}(\text{sum of squares})$  (middle), and the total counts of TCRs (bottom) of each patient or HD across time-points. Black line indicates median. Related to Fig. 1D. **D)** Lorentz curves of the TCR repertoires of each patient or HD across time-points. Lines represent cumulative frequency of clones, sorted from least frequent to most frequent. Dotted lines indicate PFS-9, solid lines indicate no PFS-9. Related to Fig. 1D, “DE50”. **E)** Ex vivo IFN-g ELISpot assay spot counts comparing reactivity to CMV, EBV, or influenza between patients with and without PFS-9. Red bar represents median.

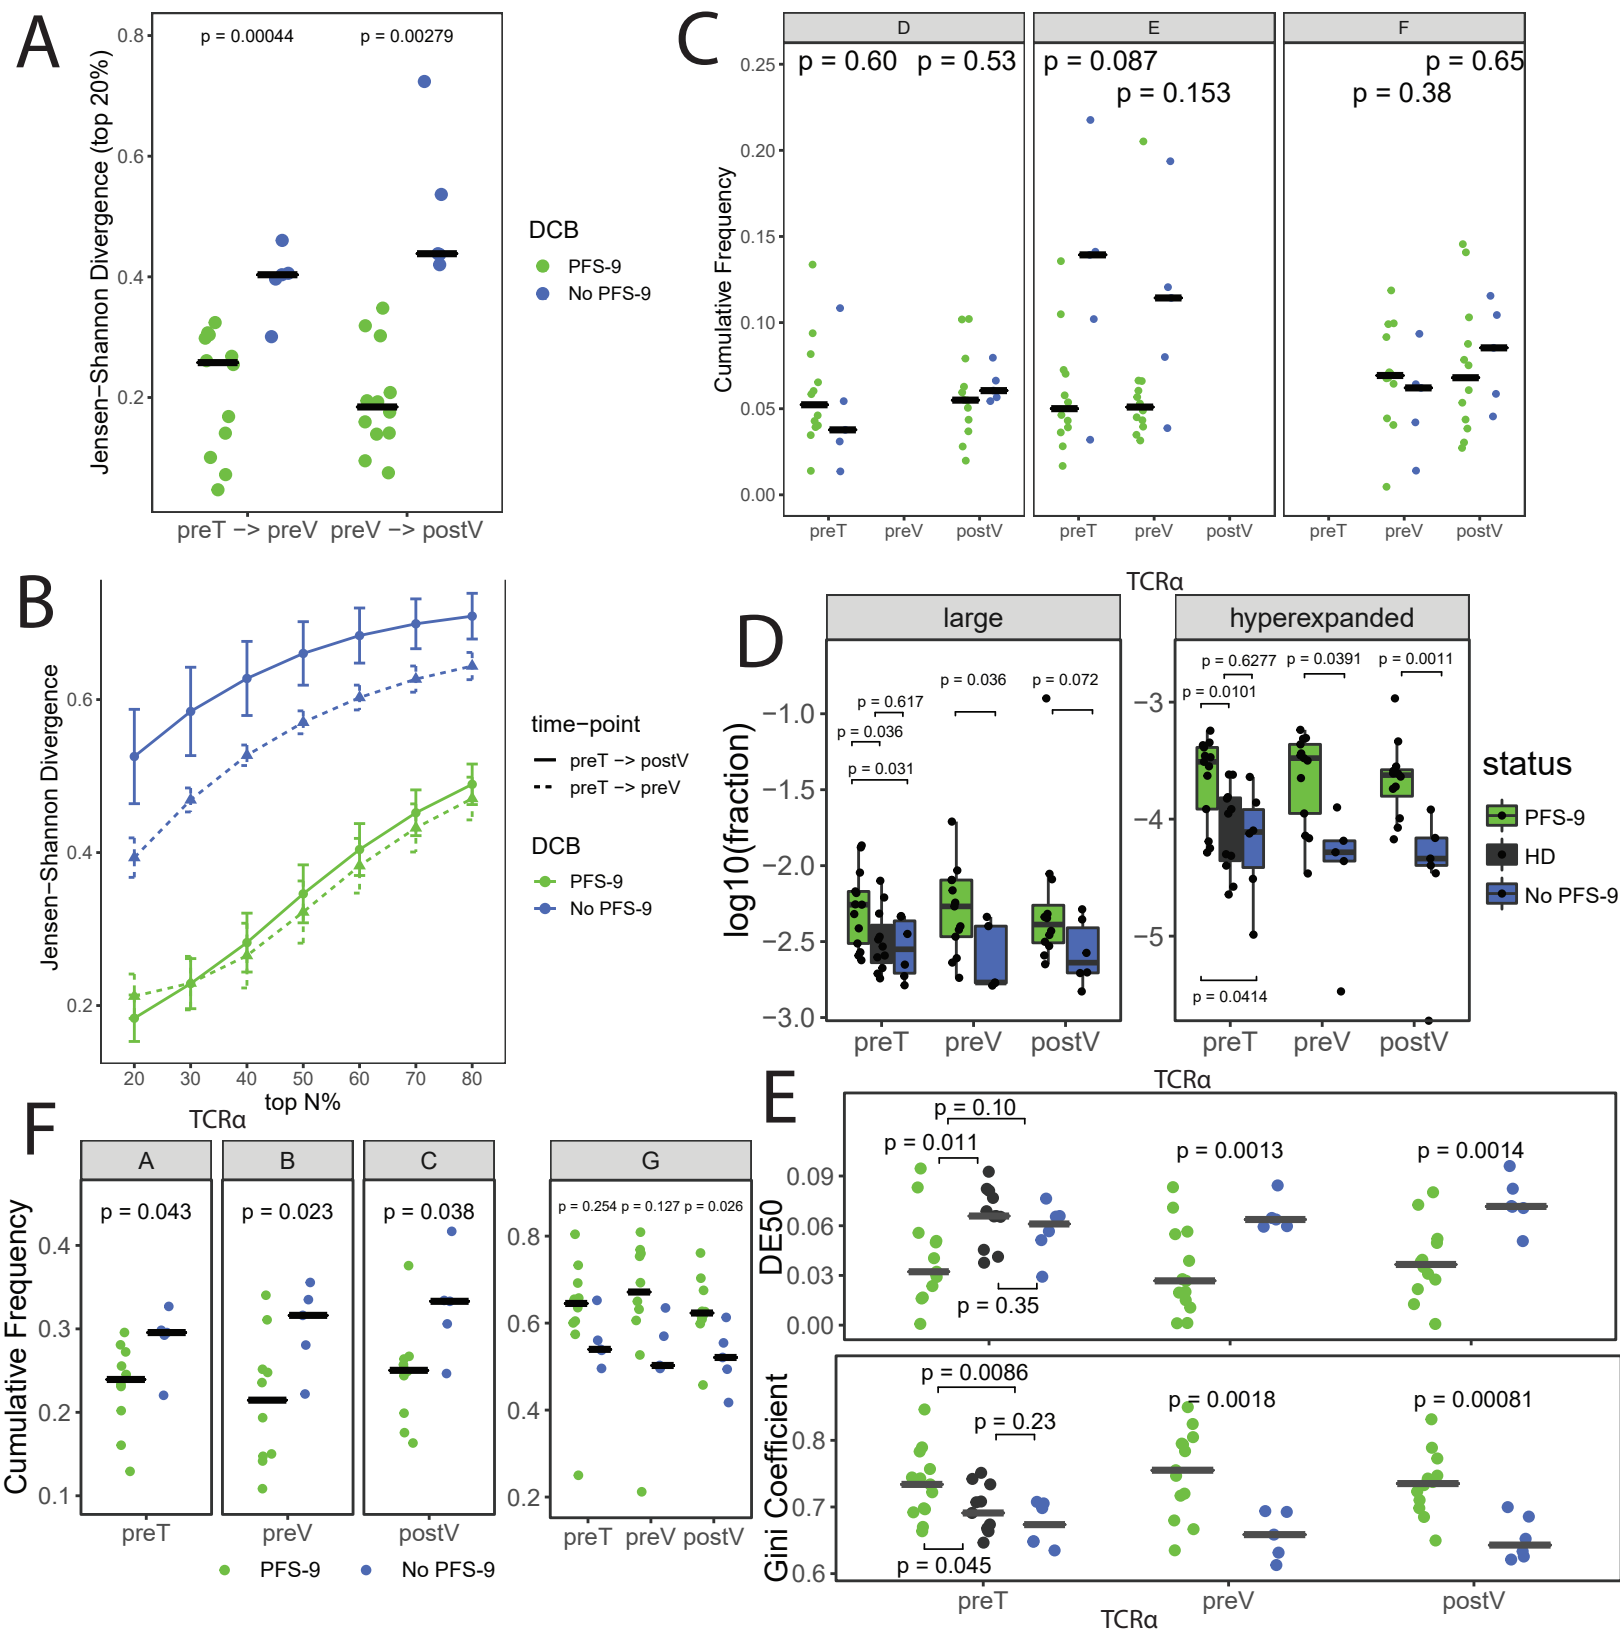

Fig. S2 – Expanded TCR $\beta$  repertoire stability measurements and TCR $\alpha$  repertoire measurements (Related to Figure 1)

**A)** Jensen-Shannon Divergence (JSD) of clones accounting for the top 20% of the repertoire between preV and pre T (left) or postV and preV (right) of patients with and without PFS-9. Low JSD values represent repertoire stability. Related to Fig. 2A. Black line indicates median.

**B)** Jensen-Shannon Divergence (JSD) of clones accounting for the top 20 - 80% of the repertoire between preV (dotted line) or postV (solid line) and baseline of patients with and without PFS-9. Low JSD values represent repertoire stability. Related to Fig. 2A.

**C)** Comparison of the cumulative frequencies of clones in either one the segments: D, E, and F between patients with and without PFS-9, at each time-point. High cumulative frequency of segment represents repertoire stability. Black line indicates median. Related to Fig. 2C.

**D)** The (log-)fraction of clones belonging to the “large” (left) or “hyperexpanded” (right), for patients with and without PFS-9 at each time-point or HDs. Boxplots indicate 25%, 50% and 75% percentiles and whiskers extend to the smallest/largest value within 1.5 times the interquartile range.

**E)** The skewedness of the TCR $\alpha$  repertoire frequency distribution measured by the Gini Coefficient (bottom) and DE50 (top) of each HD and patient across time-points. Black line indicates median.

**F)** Comparison of the cumulative frequencies of TCR $\alpha$  CDR3 sequences in either of the segments: A, B, C, and G between patients with and without PFS-9, at each time-point High cumulative frequency of G represents repertoire stability. Black line indicates median.

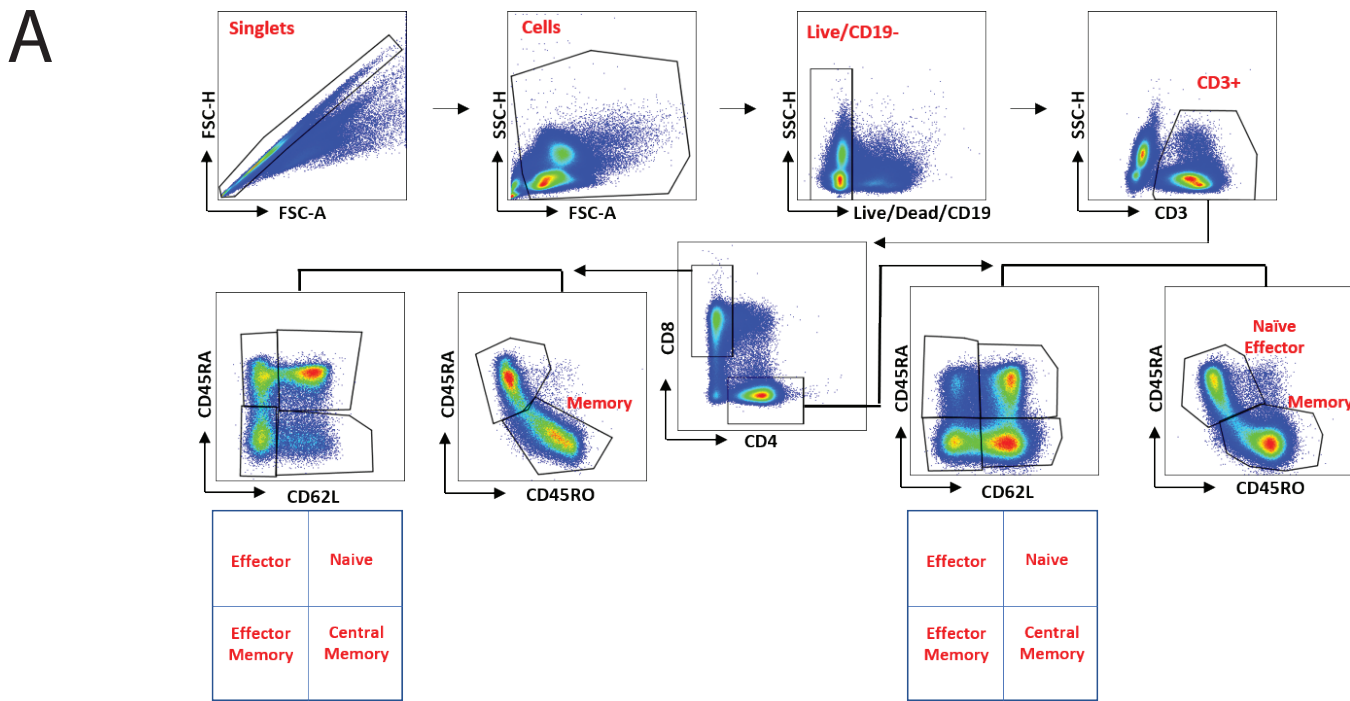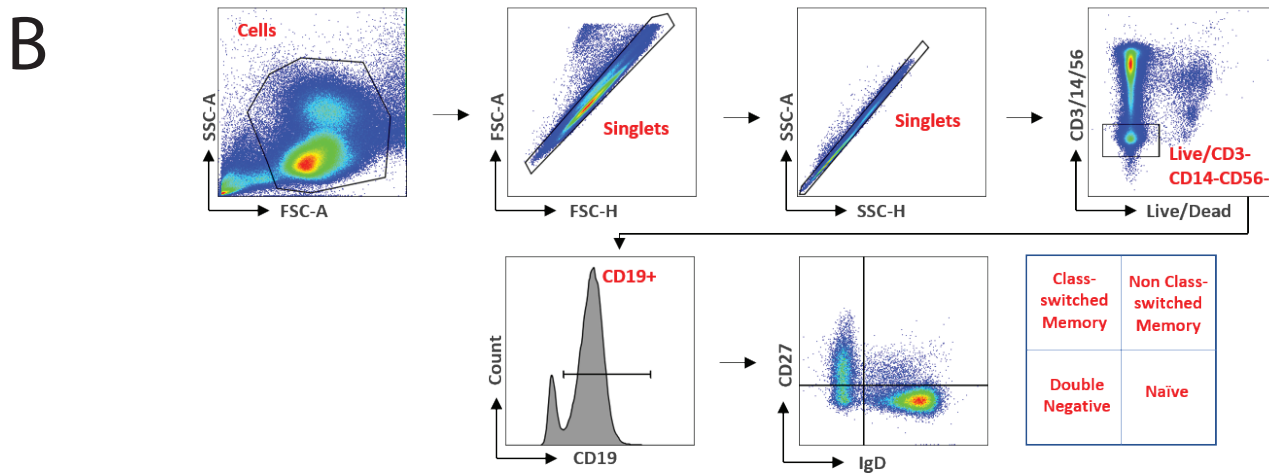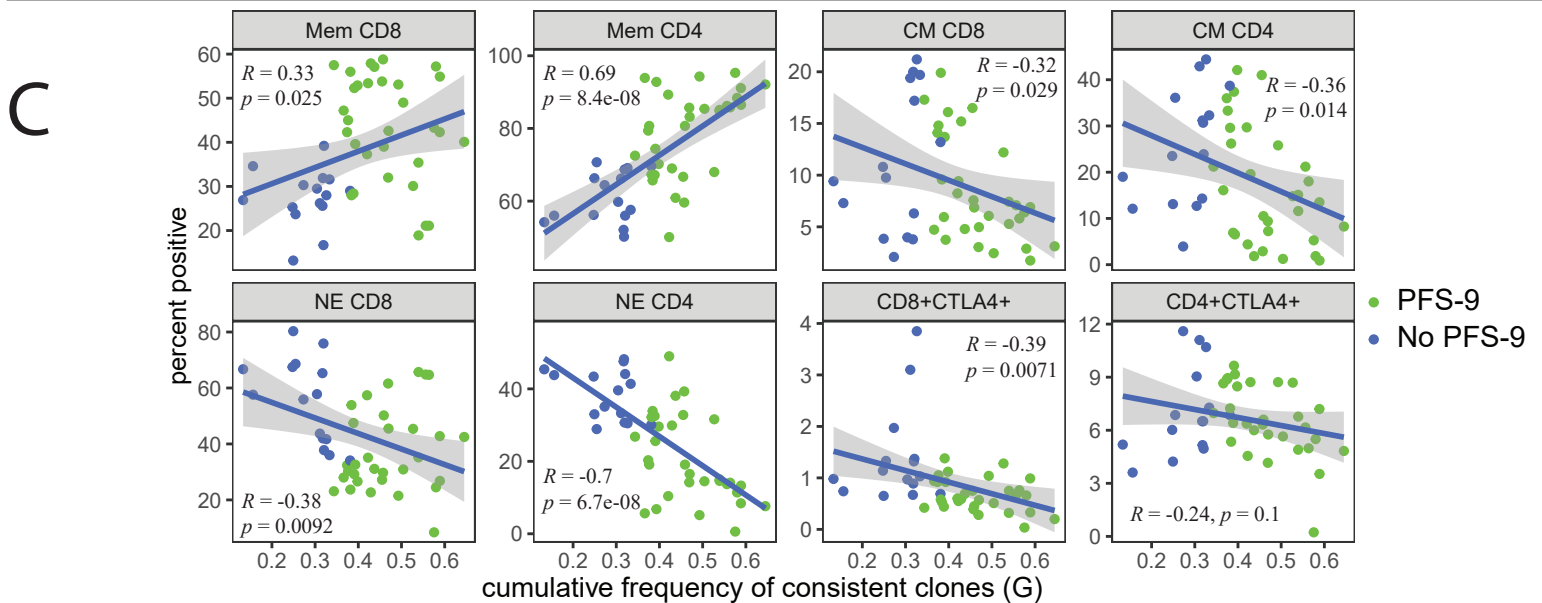

Fig. S3 – Flow-cytometry gating strategy and additional correlations between TCR $\beta$  repertoire and phenotyping (Related to Figure 3)

**A)** Gating strategy for CD4 $^{+}$  and CD8 $^{+}$  T cell subpopulations using the FlowJo software. Gating was performed in the sequence displayed, starting with singlets and cells, followed by gating on live, CD19 $^{-}$  cells, then CD3 $^{+}$ , CD4 $^{+}$  vs. CD8 $^{+}$ , and finally CD62L $^{+}$  vs CD45RA $^{+}$  or CD45RO vs CD45RA.

**B)** Gating strategy for B cell subpopulations using the FlowJo software. Gating was performed in the sequence displayed, starting with cells and singlets, followed by gating on live, CD3/CD14/CD56 $^{-}$  cells, then CD19 $^{+}$ , and finally CD27 $^{+}$  vs IgD.

**C)** The percent positive of memory (Mem) CD8 $^{+}$ , memory (Mem) CD4 $^{+}$ , central memory (CM) CD8 $^{+}$ , central memory (CM) CD4 $^{+}$ , naïve-effector (NE) CD8 $^{+}$ , naïve-effector (NE) CD4 $^{+}$ , CD8+CTLA4 $^{+}$ , CD4+CTLA4 $^{+}$  cell populations as a function of the cumulative frequency of the G segment (the persistent TCR $\beta$  clones). Color indicates patients with and without PFS-9. Related to Fig. 3B.

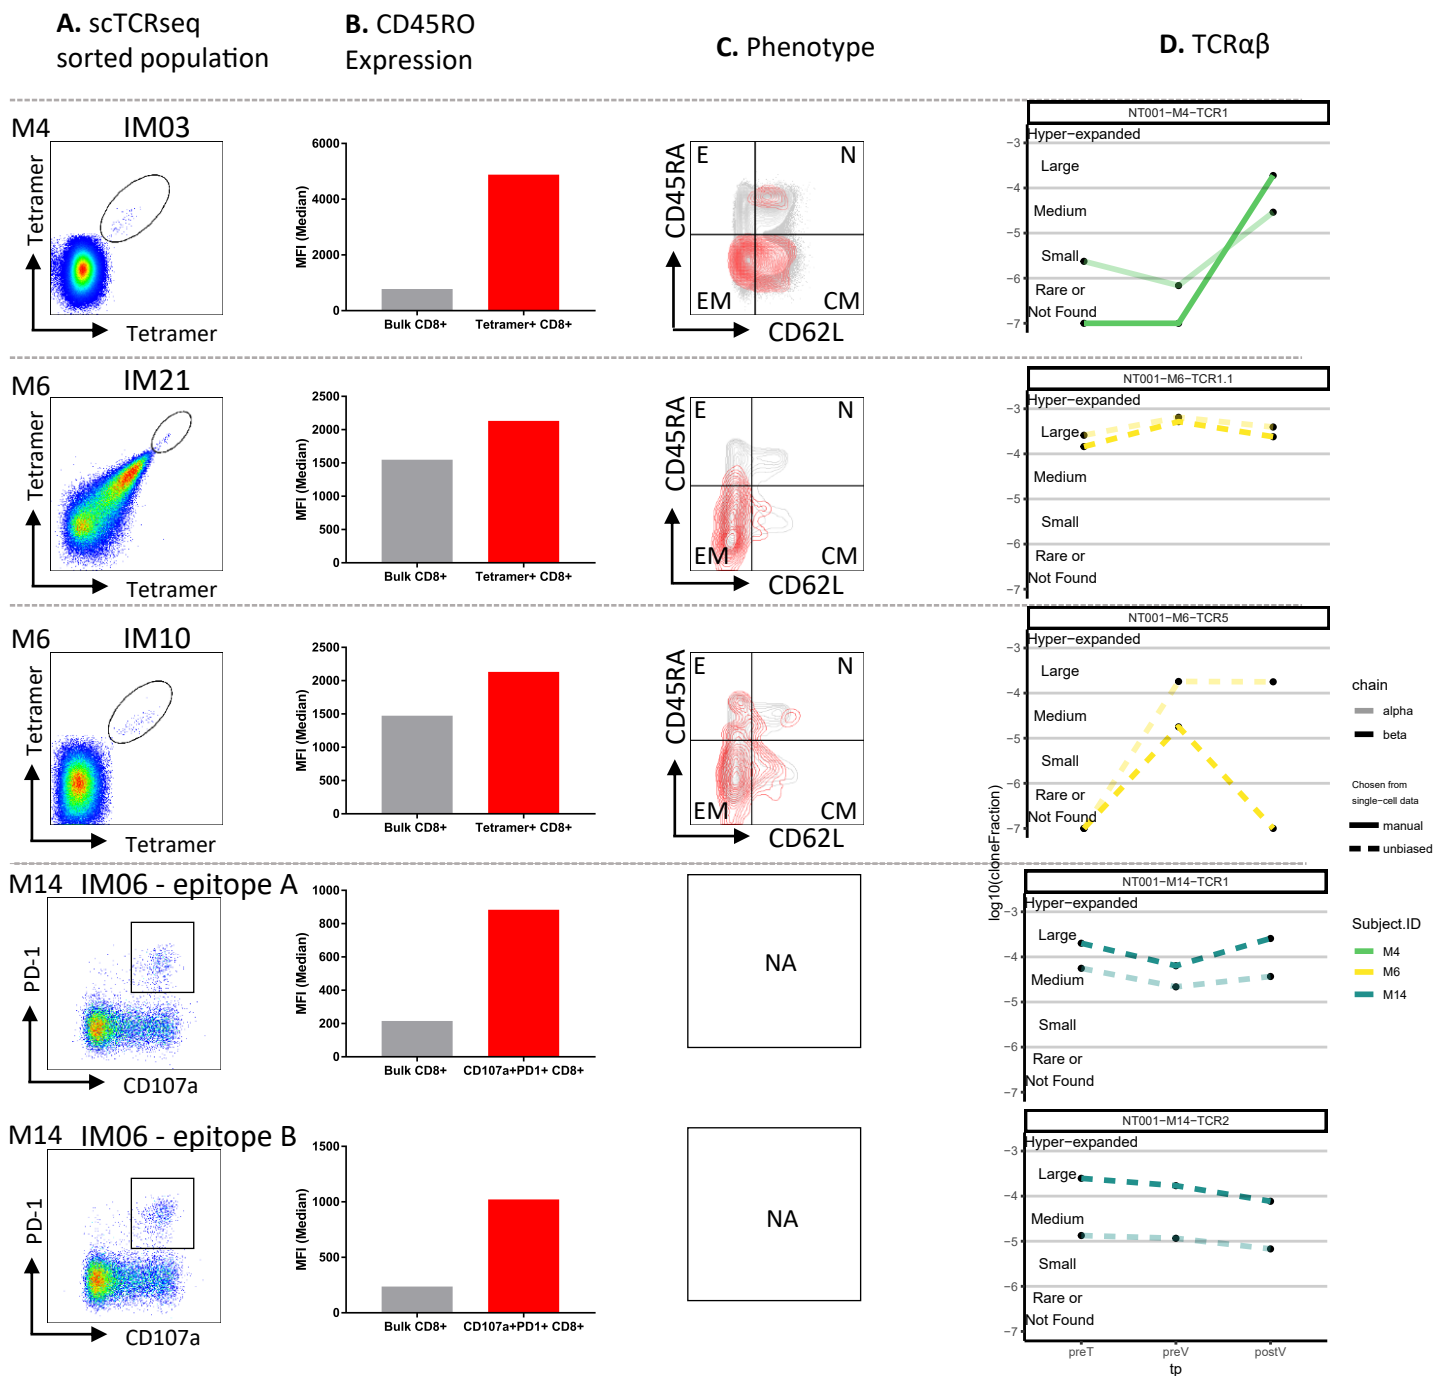

**Fig. S4 – Single-cell neoantigen-specific T cell: Frequency and the phenotype (Related to Figure 3)**

Phenotypic analysis of neoantigen-specific T cells sorted for single-cell TCR sequencing were evaluated in a parallel experiment. Each column depicts the population sorted for single cell TCR sequencing (scTCRseq sorted population), and subsequent phenotype, and TCR $\alpha/\beta$  expression in the periphery for that specific T cell population. Immunizing peptide (IM) number is indicated.

**A)** Neoantigen-specific T cells were sorted for single cell TCR sequencing using either MHC class I tetramers (M4, M6) or activation markers (M14). Tetramer-positive populations were pre-gated on singlet, live, CD19<sup>-</sup>, CD3<sup>+</sup>, CD8<sup>+</sup> T cells. M14 neoantigen-specific T cells were pre-gated on singlet, live, CD19<sup>-</sup>CD3<sup>+</sup>CD8<sup>+</sup>CD69<sup>+</sup>CD26<sup>+</sup> T cells. The immunizing peptide (IM) containing the neoantigen is indicated; each TCR clone from M14 is specific to a different epitope contained within IM06.

**B)** The expression of CD45RO was evaluated on bulk CD8<sup>+</sup> T cells (gray bars) and neoantigen-specific T cells (red bars).

**C)** Tetramer-positive neoantigen-specific T cells were also evaluated for CD45RA and CD62L (red) compared to bulk CD8<sup>+</sup> T cells (gray). E= Effector, N=Naïve, EM=Effector Memory, CM=Central Memory; NA=Not available.

**D)** the frequency of the TCR $\alpha$  and TCR $\beta$  of 5/8 validated TCRs in the peripheral blood. Color indicates patient ID, line-type indicates whether the TCR $\alpha/\beta$  was chosen for validation based on or regardless of its peripheral frequency, and transparency indicates TCR $\alpha$  vs TCR $\beta$  chains.

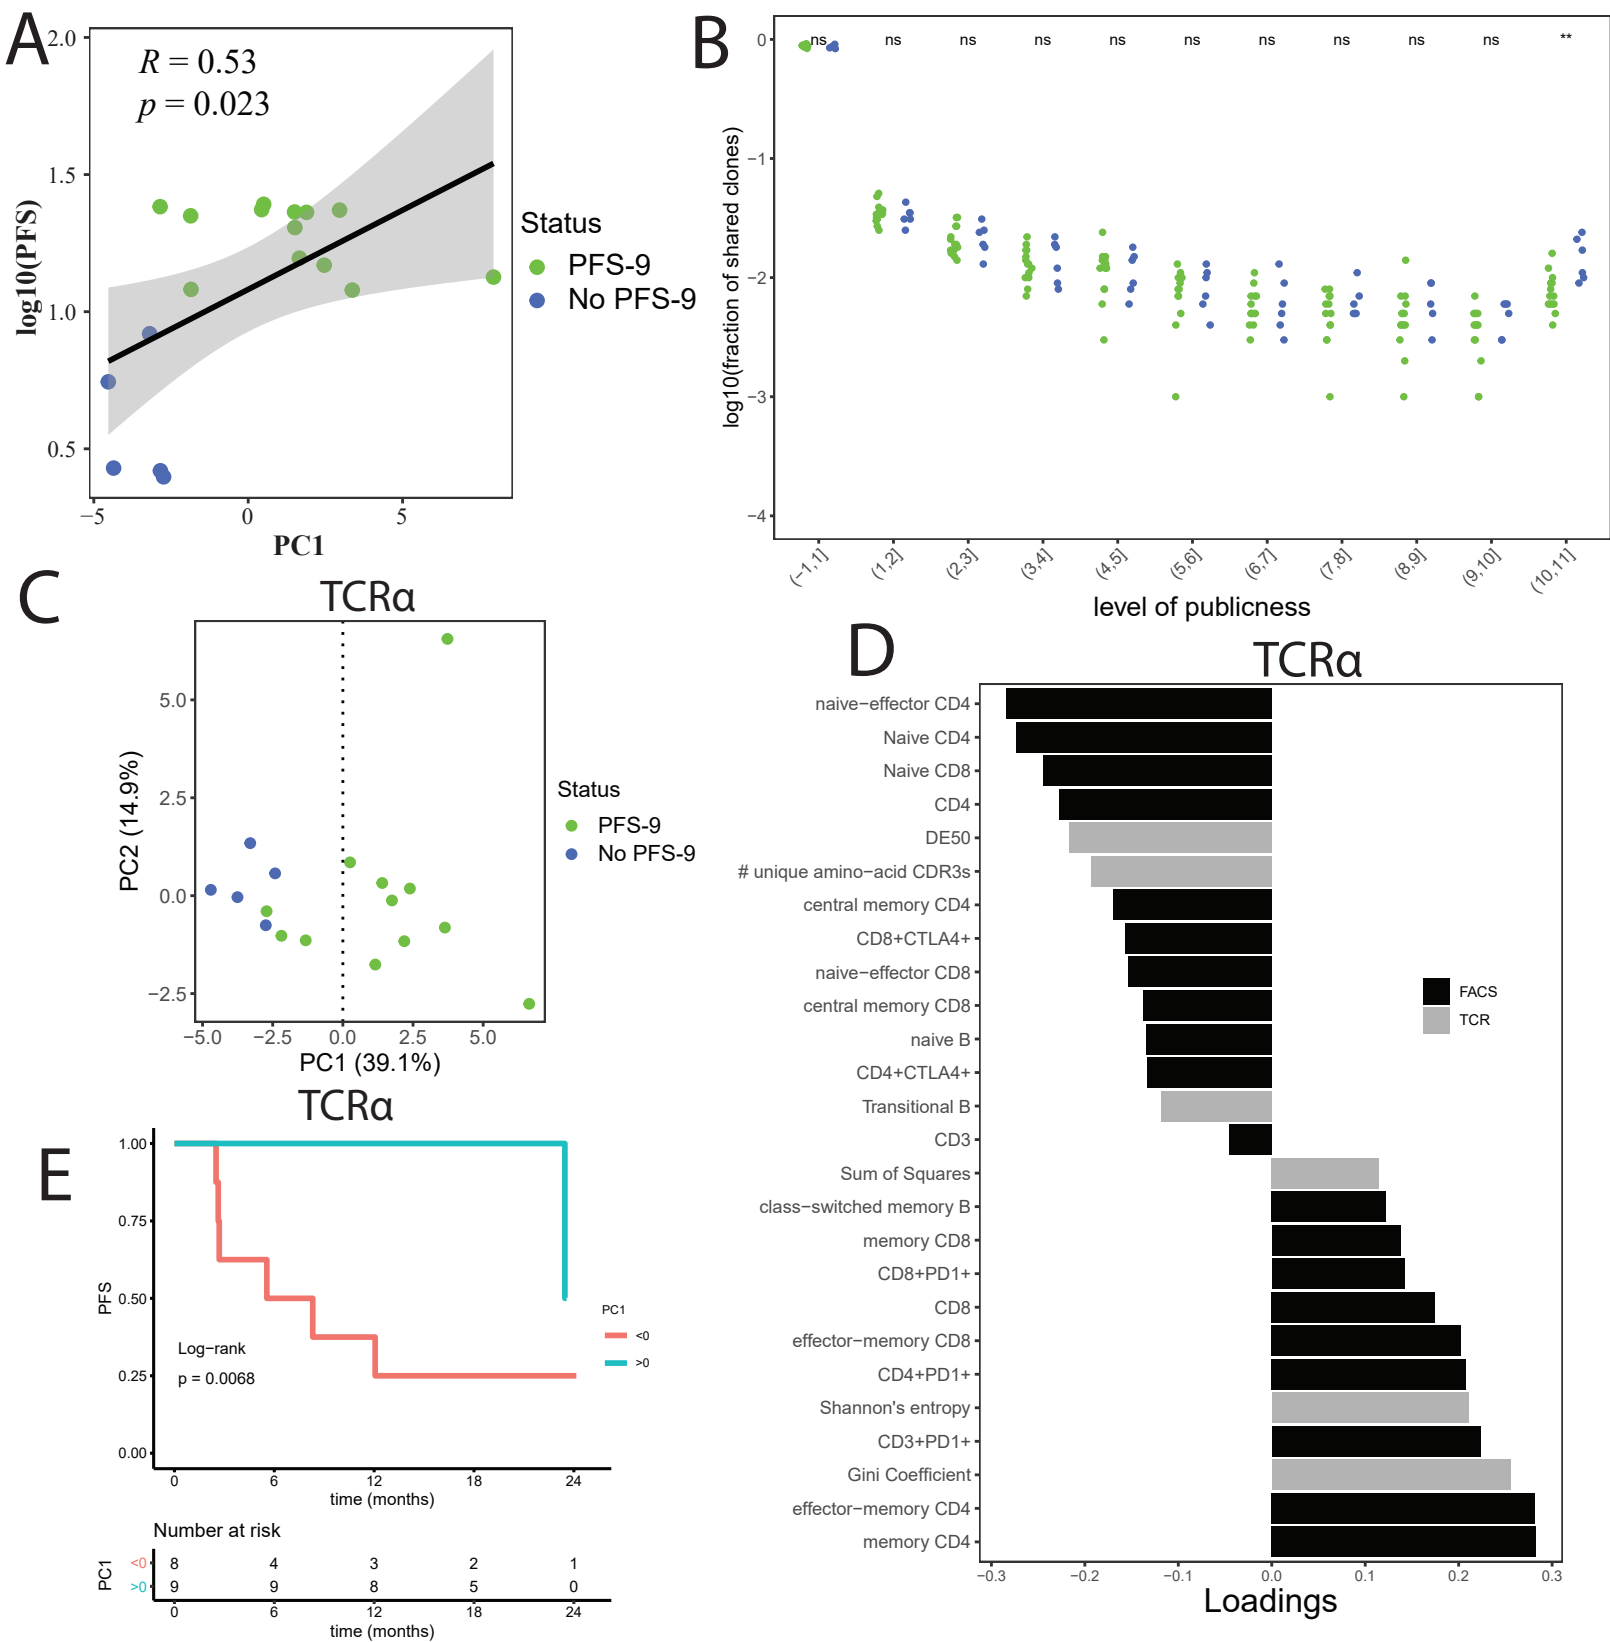

**Fig. S5 – Expanded PCA-related analyses, publicness and concordance with TCRα measurements (Related to Figure 4)**

**A)** log<sub>10</sub>(PFS) as a function of each patient's PC1 score. Related to Fig. 4A and 4C. Correlation and its statistical significance are indicated.

**B)** Fraction of public clones in patients' repertoires as a function of the level of publicness (see Methods). Related to Fig. 4E. ns indicates no significance. \*\* indicates P-value ≤ 0.01.

**C)** First 2 components from a Principal Component Analysis of the aggregate peripheral measurements from the TCRα repertoire and immunophenotyping (related to Fig. 4A)

**D)** The contributions (loadings) of the measured features to PC1, where TCR repertoire features were obtained from the TCRα CDR3 sequences. Color indicates source of data. (related to Fig. 4A)

**E)** Kaplan-Meier curves for progression-free survival (PFS) of patients with PC1>0 (teal) versus patients with PC1<0 (red), based on the PCA analysis in Fig. S4C. This result demonstrates that the pre-treatment TCRα repertoires are as predictive for PFS-9 status as the TCRβ repertoires. Median PFS was 6.93 months for PC1<0 while at 20.3 months the median has not yet been reached for PC1>0, hazard ratio=0.093, p=0.0068.

1 **Supplementary Table 1 (related to Figure 1)**

2 Table providing the age, sex, background-subtracted CEF values, PFS-9 status and the sample  
 3 availability for TCR $\alpha$  and TCR $\beta$  sequencing at each time-point.

4

| Patient | Age | Sex | CEF [spot forming cells per 1M PBMCs] | PFS-9 | Pre-Treatment Sample | Pre-Vaccine Sample | Post-Vaccine Sample |
|---------|-----|-----|---------------------------------------|-------|----------------------|--------------------|---------------------|
| M1      | 55  | F   | 549                                   | Yes   | 1                    | 1                  | 1                   |
| M10     | 63  | M   | 24                                    | Yes   | 1                    | 1                  | 1                   |
| M12     | 63  | M   | 239                                   | Yes   | 1                    | 1                  | 1                   |
| M13     | 60  | M   | 0                                     | Yes   | 1                    | 1                  | 1                   |
| M14     | 77  | M   | 419                                   | Yes   | 1                    | 1                  | 1                   |
| M15     | 80  | F   | 514                                   | No    | 1                    | 1                  | 1                   |
| M16     | 25  | M   | 700                                   | No    | 0                    | 0                  | 1                   |
| M17     | 37  | M   | 16                                    | No    | 1                    | 1                  | 1                   |
| M18     | 71  | M   | 2                                     | Yes   | 1                    | 1                  | 1                   |
| M2      | 65  | M   | 109                                   | Yes   | 1                    | 1                  | 1                   |
| M20     | 59  | M   | 980                                   | No    | 1                    | 1                  | 1                   |
| M22     | 47  | F   | 892                                   | Yes   | 1                    | 0                  | 1                   |
| M23     | 67  | M   | 583                                   | Yes   | 1                    | 1                  | 1                   |
| M3      | 62  | M   | 333                                   | No    | 1                    | 1                  | 1                   |
| M4      | 52  | F   | N/A                                   | No    | 1                    | 1                  | 1                   |
| M5      | 57  | M   | 256                                   | Yes   | 1*                   | 1                  | 1                   |
| M6      | 54  | F   | N/A                                   | Yes   | 1                    | 1                  | 1                   |
| M7      | 84  | M   | 286                                   | Yes   | 1                    | 1                  | 1                   |
| M8      | 59  | M   | 836                                   | Yes   | 1                    | 1                  | 1*                  |
| M9      | 50  | F   | 963                                   | Yes   | 1                    | 1                  | 0                   |
| NV10    | 59  | M   | N/A                                   | No    | 1                    | 0                  | 0                   |
| HD1     | 50  | M   |                                       |       |                      |                    |                     |
| HD2     | 44  | F   |                                       |       |                      |                    |                     |
| HD3     | 51  | F   |                                       |       |                      |                    |                     |
| HD4     | 40  | M   |                                       |       |                      |                    |                     |
| HD5     | 31  | M   |                                       |       |                      |                    |                     |
| HD6     | 49  | M   |                                       |       |                      |                    |                     |
| HD7     | 21  | F   |                                       |       |                      |                    |                     |
| HD8     | 32  | F   |                                       |       |                      |                    |                     |
| HD9     | 29  | M   |                                       |       |                      |                    |                     |
| HD10    | 25  | M   |                                       |       |                      |                    |                     |
| HD11    | 34  | M   |                                       |       |                      |                    |                     |

5

6 \* Only TCR $\beta$  sample available.

1  
2  
3

### Supplementary Table 2 (related to Fig. 3)

Table summarizing the eight validated TCRs following the single-cell TCR sequencing.

| Patient | PFS9 | Co-Receptor | CDR3 $\alpha$ | CDR3 $\beta$ | Selection Method |
|---------|------|-------------|---------------|--------------|------------------|
| M1**    | Yes  | CD8         | AGSSASKII     | ASSEAFSNYGYT | Manual*          |
| M4      | No   | CD8         | VAYNAGNMLT    | ASYQTSGH     | Manual*          |
| M6      | Yes  | CD8         | AVRPGSQGNLI   | ASSVGGGTVEQF | unbiased         |
| M6      | Yes  | CD8         | LVGDIGGATNKLI | ASRPGQGLEKLF | unbiased         |
| M13**   | Yes  | CD4         | AGNNARLM      | ASSPIRGAQH   | unbiased         |
| M13**   | Yes  | CD4         | AGSNARLM      | ASSLIRGTQY   | unbiased         |
| M14     | Yes  | CD8         | VVIDNKLI      | ASSLNRESQPQH | unbiased         |
| M14     | Yes  | CD8         | ASVGDTGGFKTI  | ASSLSETYEQY  | unbiased         |

4  
5  
6  
7

\*Manual means these clones were selected for validation due to being undetected at the pre-treatment time-point and significantly expanded at the post-vaccine time-point.

\*\*Previously reported in Ott, et al, Cell 2020<sup>7</sup>.
